# Supplementary material
Source: Springer Nature journal article supplement (https://www.springermedizin.de/resource/supplementary/12990_2007_83_MOESM1_ESM.pdf/9612620)

**A Spino-PB**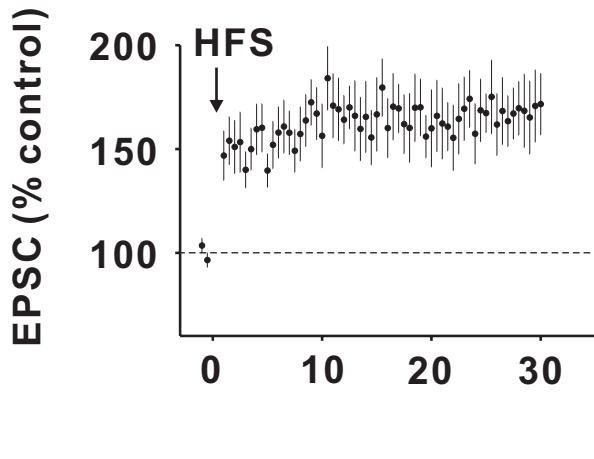**B Spino-PAG**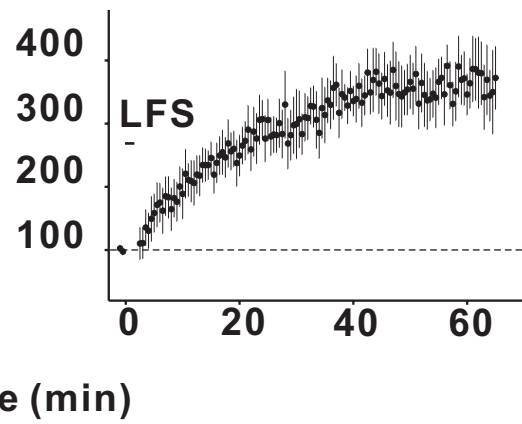**C**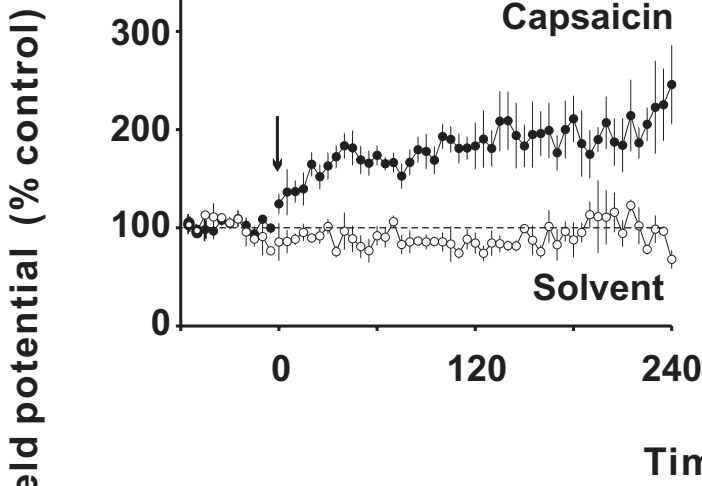**D**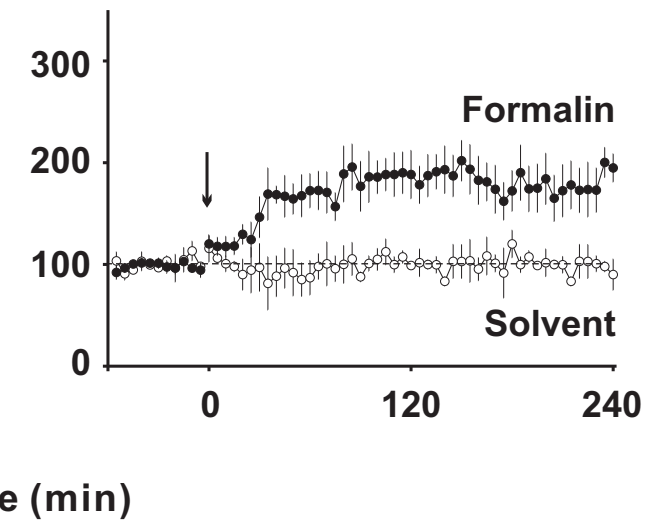**E**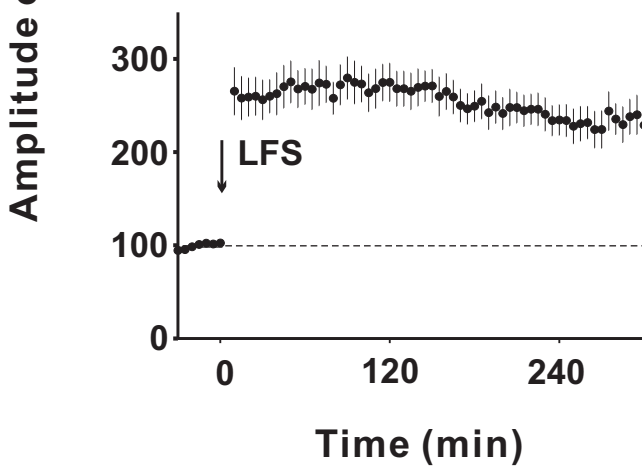

Supplement: MOESM1 [file 9612620]
